# Supplementary material
Source: MDPI journal article supplement (https://www.mdpi.com/2072-4292/13/22/4587)
Supplement: s1 [file s1]

## Supplementary Materials

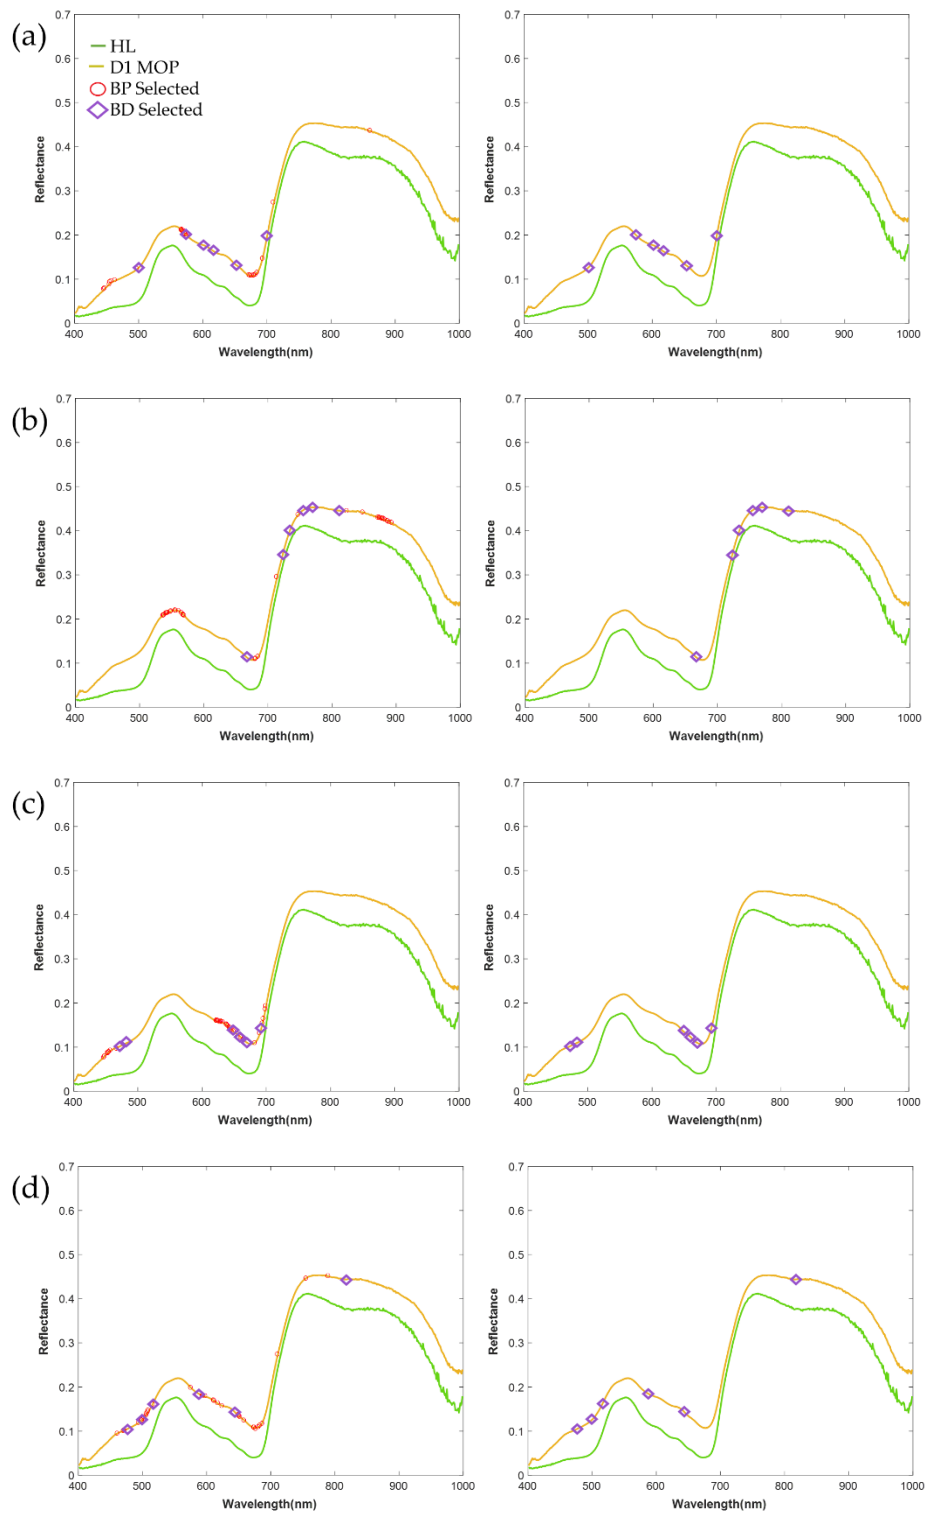

**Figure S1.** Bands selected through band prioritization and band decorrelation using criteria of (a) Variance, (b) Kurtosis, (c)Skewness and (d) SNR.

(a)

|                | Ground Truth |       |       |       |
|----------------|--------------|-------|-------|-------|
| Predict result | 973          | 22    | 9     | 96.9% |
|                | 22           | 936   | 51    | 92.8% |
|                | 5            | 42    | 940   | 95.2% |
|                | 97.3%        | 93.6% | 94.0% | 95.0% |

(b)

|                | Ground Truth |       |       |       |
|----------------|--------------|-------|-------|-------|
| Predict result | 960          | 77    | 15    | 91.3% |
|                | 36           | 844   | 134   | 83.2% |
|                | 4            | 79    | 851   | 91.1% |
|                | 96.0%        | 84.4% | 85.1% | 88.5% |

|                | Ground Truth |       |       |       |
|----------------|--------------|-------|-------|-------|
| Predict result | 970          | 89    | 14    | 90.4% |
|                | 24           | 833   | 145   | 83.1% |
|                | 6            | 78    | 841   | 90.9% |
|                | 97.0%        | 83.3% | 84.1% | 88.1% |

(c)

|                | Ground Truth |       |       |       |
|----------------|--------------|-------|-------|-------|
| Predict result | 972          | 80    | 13    | 91.3% |
|                | 22           | 871   | 122   | 85.8% |
|                | 6            | 49    | 865   | 94.0% |
|                | 97.2%        | 87.1% | 86.5% | 90.3% |

|                | Ground Truth |       |       |       |
|----------------|--------------|-------|-------|-------|
| Predict result | 971          | 86    | 16    | 90.5% |
|                | 26           | 828   | 149   | 82.6% |
|                | 3            | 86    | 835   | 90.4% |
|                | 97.1%        | 82.8% | 83.5% | 87.8% |

(d)

|                | Ground Truth |       |       |       |
|----------------|--------------|-------|-------|-------|
| Predict result | 974          | 87    | 26    | 89.6% |
|                | 25           | 787   | 109   | 85.5% |
|                | 1            | 126   | 865   | 87.2% |
|                | 97.4%        | 78.7% | 86.5% | 87.5% |

|                | Ground Truth |       |       |       |
|----------------|--------------|-------|-------|-------|
| Predict result | 963          | 85    | 19    | 90.3% |
|                | 32           | 782   | 113   | 84.4% |
|                | 5            | 133   | 868   | 86.3% |
|                | 96.3%        | 78.2% | 86.8% | 87.1% |

(e)

|                | Ground Truth |       |       |       |
|----------------|--------------|-------|-------|-------|
| Predict result | 957          | 95    | 30    | 88.4% |
|                | 36           | 825   | 154   | 81.3% |
|                | 7            | 80    | 816   | 90.4% |
|                | 95.7%        | 82.5% | 81.6% | 86.6% |

|                | Ground Truth |       |       |       |
|----------------|--------------|-------|-------|-------|
| Predict result | 966          | 145   | 25    | 85.0% |
|                | 30           | 762   | 158   | 80.2% |
|                | 4            | 93    | 817   | 89.4% |
|                | 96.6%        | 76.2% | 81.7% | 84.8% |

(f)

|                | Ground Truth |       |       |       |
|----------------|--------------|-------|-------|-------|
| Predict result | 978          | 133   | 26    | 86.0% |
|                | 18           | 784   | 185   | 79.4% |
|                | 4            | 83    | 789   | 90.1% |
|                | 97.8%        | 78.4% | 78.9% | 85.0% |

|                | Ground Truth |       |       |       |
|----------------|--------------|-------|-------|-------|
| Predict result | 969          | 126   | 24    | 86.6% |
|                | 26           | 780   | 163   | 80.5% |
|                | 5            | 94    | 813   | 89.1% |
|                | 96.9%        | 78.0% | 81.3% | 85.4% |

**Figure S2.** Confusion Matrix result of DNN model in (a) full bands and band selection (left) and band expansion processes (right) using criteria of, (b) Variance, (c) Entropy, (d) Kurtosis, (e) Skewness and (f) SNR.

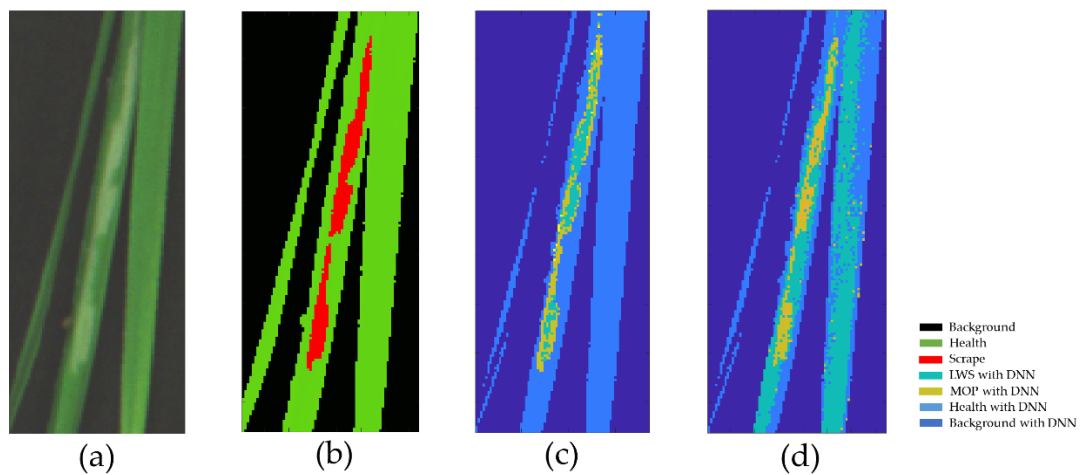

**Figure S3.** Prediction of spectral information from unknown rice sample: (a) true color image, (b) Ground Truth, (c) CEM\_band selection→DNN\_band selection and (d) DNN\_band selection without DNN.

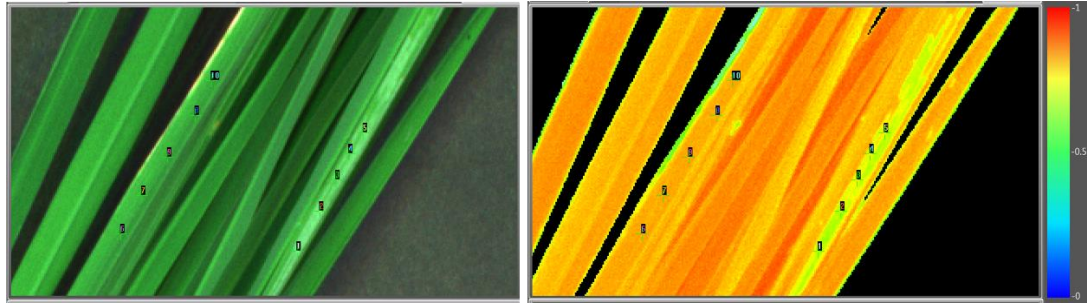

**Figure S4.** Entoscan Plant imaging system. True color image (left) and NDVI image (right), The color bar is used to assess the growth status of the leaves. The closer the value to 1, the condition is better.

Full bands (466 band · 400-1000 nm) · It took a total of 8 minutes and 11 seconds

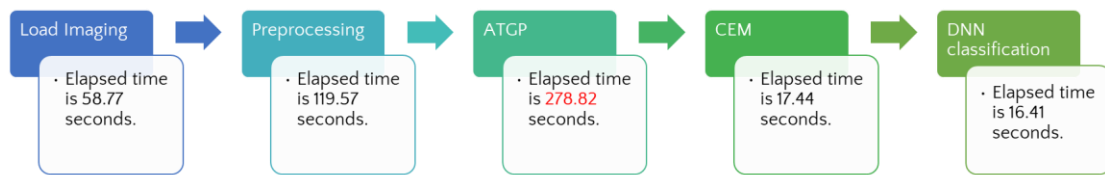

Band selection (6 band) · It took a total of 3 minutes and 20 seconds

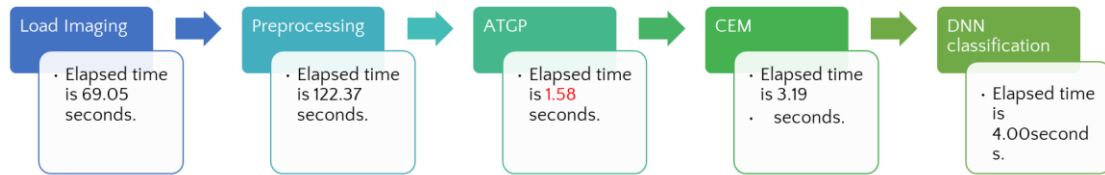

**Figure S5.** Approximate time required for each step of the prediction of unknown samples.

**Table S1.** Results of the first six bands of band selection using different criteria.

| Criteria | First six wavelengths selected (nm) |     |     |     |     |     |
|----------|-------------------------------------|-----|-----|-----|-----|-----|
| Variance | 622                                 | 705 | 603 | 663 | 579 | 504 |
| Entropy  | 705                                 | 603 | 501 | 664 | 489 | 684 |
| Kurtosis | 730                                 | 747 | 778 | 779 | 679 | 812 |
| Skewness | 679                                 | 663 | 652 | 689 | 467 | 480 |
| SNR      | 467                                 | 500 | 530 | 578 | 634 | 810 |

**Table S2.** The accuracy of DNN classification evaluated by confusion matrix.

| Analysis Method                       | Pixel number    |                 |                 |                 | OA (%) |
|---------------------------------------|-----------------|-----------------|-----------------|-----------------|--------|
|                                       | TP <sup>2</sup> | FP <sup>3</sup> | TN <sup>4</sup> | FN <sup>5</sup> |        |
| CEM_band selection→DNN_band selection | 497             | 138             | 11984           | 109             | 98.05  |
| DNN_band selection                    | 251             | 2042            | 9525            | 355             | 76.81  |
